# Supplementary material for: Fracture healing is delayed in the absence of gasdermin-interleukin-1 signaling
Source: eLife. 2022 Mar 4;11:e75753. doi: 10.7554/eLife.75753 (PMC8923664; doi:10.7554/eLife.75753)
Supplement: Figure 1—figure supplement 1—source data 1. [file elife-75753-fig1-figsupp1-data1.xlsx]

## Sheet: Sheet1
Figure S1a
	Gsdma(fold change)		BM-free tibias(unfractured)				BM-free tibias(fractured)
		WT	1	0.21	2.51	0.48	0	0.1	0	0.18
		Gsdmd-/-	0.21	0.02	0.08	0.76	0.13	0.05	0.15	0.06
	Gsdma2(fold change)		BM-free tibias(unfractured)				BM-free tibias(fractured)
		WT	1	0.06	0.35	0.54	0.27	0	0.1	0.03
		Gsdmd-/-	0.23	0.18	0.23	3.3	0.01	0.13	0.12	0.13
	Gsdma3(fold change)		BM-free tibias(unfractured)				BM-free tibias(fractured)
		WT	1	0.52	0.09	0.12	0.02	0	0	0.01
		Gsdmd-/-	3.12	0.35	0.05	1	0	0	0	0.02
	Gsdmc(fold change)		BM-free tibias(unfractured)				BM-free tibias(fractured)
		WT	1	0.73	1.11	0.78	0	0.01	0.08	0
		Gsdmd-/-	0.74	0.19	0.28	0.19	0	0.01	0	0
	Gsdmc2(fold change)		BM-free tibias(unfractured)				BM-free tibias(fractured)
		WT	1	0.66	1.2	0.09	0.03	0.09	0.01	0.33
		Gsdmd-/-	0.38	0.16	0.06	1.02	0.14	0.11	0.15	0.01
	Gsdmc3(fold change)		BM-free tibias(unfractured)				BM-free tibias(fractured)
		WT	0	0.9	4.2	31.37	0.27	0	5.35	1.41
		Gsdmd-/-	0	21.06	10.69	27.92	10.3	0.19	0.13	5.23
	Gsdmc4(fold change)		BM-free tibias(unfractured)				BM-free tibias(fractured)
		WT	1	0.31	0.09	0.04	0.05	0.06	0.02	0.02
		Gsdmd-/-	1.1	0.03	0.07	0	0.02	0.02	0.06	0.01
Figure S1b
	Gsdma(fold change)		BM(unfractured tibias)				BM(fractured tibias)
		WT	1	1.26	0.96	0.54	0.21	0.1	0.03	0.11
		Gsdmd-/-	0.83	0.93	0.86	0.91	1.48	0.12	0.14	0.03
	Gsdma2(fold change)		BM(unfractured tibias)				BM(fractured tibias)
		WT	1	1.26	1.83	1.29	5.04	25.46	27.35	3.14
		Gsdmd-/-	1.35	1.68	1.99	0.89	1.74	7.12	1.38	2.61
	Gsdma3(fold change)		BM(unfractured tibias)				BM(fractured tibias)
		WT	1	0.26	2.05	0	9.24	73.14		0
		Gsdmd-/-	6.32	1	70.34	4.5	1.3		127.96	165.89
	Gsdmc(fold change)		BM(unfractured tibias)				BM(fractured tibias)
		WT	1	0.72	2.49	11.65	17.2	47.91	128.47	42.66
		Gsdmd-/-	2.75	0.18	1.39	0.79	1.29	0.56	37.94	4.21
	Gsdmc2(fold change)		BM(unfractured tibias)				BM(fractured tibias)
		WT	1	0.53	0.69	2.24	1.95	2.15	35.54	8.36
		Gsdmd-/-	0.48	0.72	1.38	0.85	1.27	4.08	1.24	12.75
	Gsdmc3(fold change)		BM(unfractured tibias)				BM(fractured tibias)
		WT	1	0.55	0.7	1.14	0.79	1.43	0.12	0.03
		Gsdmd-/-	1.13	0.46	1.27	0.7	0.64	2.81	1.77	0
	Gsdmc4(fold change)		BM(unfractured tibias)				BM(fractured tibias)
		WT	1	0.62	0.89	0.79	6.36	5.36	31.37	1.38
		Gsdmd-/-	2.34	0.99	2.34	0.87	0.8	4.74	3.18	17.65
