# Supplementary material for: Fracture healing is delayed in the absence of gasdermin-interleukin-1 signaling
Source: eLife. 2022 Mar 4;11:e75753. doi: 10.7554/eLife.75753 (PMC8923664; doi:10.7554/eLife.75753)
Supplement: Figure 1—figure supplement 2—source data 1. [file elife-75753-fig1-figsupp2-data1.xlsx]

## Sheet: Sheet1
Fig. S3a
	ASC(fold change)		BM-free tibias(unfractured)				BM-free tibias(fractured)
		WT	1	0.66	1.09	1.44	5.9	5.7	5.24	6.25
		Gsdmd-/-	1.84	1.84	1.64	1.88	2.16	2.64	2.71	1.3
	Casp-1(fold change)		BM-free tibias(unfractured)				BM-free tibias(fractured)
		WT	1	0.76	1.24	1.88	5.88	5.49	7.4	6.33
		Gsdmd-/-	2.18	1.87	1.73	2.68	1.64	2.52	2.6	1.76
	Nlrc4(fold change)		BM-free tibias(unfractured)				BM-free tibias(fractured)
		WT	1	0.04	0.01	0.02	0.03	0.03	0.03	0.08
		Gsdmd-/-	0.02	0.01	0.09	0.02	0.05	0.02	0.03	0.02
	Casp-11(fold change)		BM-free tibias(unfractured)				BM-free tibias(fractured)
		WT	1	0.3	0.49	0.13	0.63	0.93	0.46	0.57
		Gsdmd-/-	0.09	0.11	0.1	0.12	0.14	0.27	0.26	0.28
Fig. S3b
	ASC(fold change)		BM(unfractured tibias)				BM(fractured tibias)
		WT	1	0.76	0.64	0.79	1.16	0.46	0.57	0.42
		Gsdmd-/-	0.7	0.8	0.91	0.94	0.81	1.59	0.84	0.66
	Casp-1(fold change)		BM(unfractured tibias)				BM(fractured tibias)
		WT	1	0.8	0.92	1.48	3.61	5	4.25	5.52
		Gsdmd-/-	0.92	1.05	0.81	0.77	1.08	6.05	3.93	9.94
	Nlrc4(fold change)		BM(unfractured tibias)				BM(fractured tibias)
		WT	1	0.41	0.91	1.17	0.72	1.99	7.11	1.84
		Gsdmd-/-	1.06	0.94	1.27	0.49	0.83	2.44	1.15	6.42
	Casp-11(fold change)		BM(unfractured tibias)				BM(fractured tibias)
		WT	1	0.51	0.59	0.64	0.65	0.5	0.35	0.2
		Gsdmd-/-	0.56	0.55	0.6	0.65	0.53	2.37	0.75	0.53
