# Supplementary material for: Fracture healing is delayed in the absence of gasdermin-interleukin-1 signaling
Source: eLife. 2022 Mar 4;11:e75753. doi: 10.7554/eLife.75753 (PMC8923664; doi:10.7554/eLife.75753)
Supplement: Figure 1—source data 1. [file elife-75753-fig1-data1.xlsx]

## Sheet: Sheet1
Figure 1a
	Gsdmd(fold change)		BM(unfractured tibias)				BM(fractured tibias)
		WT	1	0.72	0.87	0.95	1.59	1.18	1.35	1.38
		Gsdmd-/-	0.19	0	0.37	0.2	0.12	0.33	0.1	0.09
	Gsdme(fold change)		BM(unfractured tibias)				BM(fractured tibias)
		WT	1	0.75	0.96	1.16	1.43	0.5	0.51	0.71
		Gsdmd-/-	1.02	1.11	1.09	1.69	0.87	1.41	2.25	0.26
Figure 1b
	Gsdmd(fold change)		BM-free tibias(unfractured)				BM-free tibias(fractured)
		WT	1	0.38	1.3	2	8.53	9.57	8.56	11.3
		Gsdmd-/-	0.1	0.11	0.14	0.1	0.17	0.33	0.25	0.17
	Gsdme(fold change)		BM-free tibias(unfractured)				BM-free tibias(fractured)
		WT	1	1.64	2.14	0.98	0.07	0.06	0.05	0.02
		Gsdmd-/-	18.45	17.29	5.27	10.83	11.46	9.64	10.28	4.8
