# Supplementary material for: Fracture healing is delayed in the absence of gasdermin-interleukin-1 signaling
Source: eLife. 2022 Mar 4;11:e75753. doi: 10.7554/eLife.75753 (PMC8923664; doi:10.7554/eLife.75753)
Supplement: Figure 1—source data 3. [file elife-75753-fig1-data3.xlsx]

## Sheet: Sheet1
Figure 1e
		WT					Gsdmd-/-					Gsdme-/-					Gsdmd-/-, Gsdme-/-
	Day10	2.4426	2.4477	3.0358	3.0034	2.8235	1.8517	1.9042	2.1361	2.3509	2.5275	2.2358	1.3889	2.1978	1.8647	1.4711	2.3951	2.0356	2.0174	2.3173
	Day14	3.1757	4.0243	3.5054	3.6447	3.3303	2.5321	2.775	2.7376	3.0201	2.5927	2.3803	3.1857	2.8281	2.8555	2.2328	3.0346	2.9072	3.2152	2.6392	3.0052
