# Supplementary material for: Fracture healing is delayed in the absence of gasdermin-interleukin-1 signaling
Source: eLife. 2022 Mar 4;11:e75753. doi: 10.7554/eLife.75753 (PMC8923664; doi:10.7554/eLife.75753)
Supplement: Figure 2—source data 1. [file elife-75753-fig2-data1.xlsx]

## Sheet: Sheet1
Figure 2a		WT						Gsdmd-/-
	Day7	1.4831	1.399	1.5308	1.3405	1.7994	1.8928	1.3981	1.169	1.7151	1.1849	1.3033	1.52
	Day10	2.4083	2.4901	3.0034	2.803	2.551	2.6994	1.8414	1.9202	2.1222	2.1743	2.4	2.4827
	Day14	3.1482	3.9514	3.4631	3.7245	3.3953	3.5767	2.408	2.7356	2.6524	3.075	2.7533	2.4901
	Day21	3.8734	4.0632	3.9272	3.5172	3.1094	2.8512	4.2744	3.29	2.7988	4.3618	3.9164	2.8898
	Day28	2.0194	1.5991	1.8005	1.4632	1.9857	1.7141	2.8084	2.1779	3.0679	2.328	3.1438	2.2611
Figure 2c		WT					Gsdmd-/-
	Day 7	0.35	0.45	0.44	0.38	0.45	0.22	0.24	0.2	0.19	0.13
	Day 10	0.04	0.04	0.08	0.1	0.1	0.12	0.13	0.2	0.17	0.11
Figure 2d		WT					Gsdmd-/-
	Day 7	0.18	0.23	0.22	0.3	0.2	0.08	0.04	0.16	0.03	0.19
	Day 10	0.34	0.33	0.5	0.44	0.54	0.32	0.31	0.36	0.23	0.31
Figure 2e		WT					Gsdmd-/-
	Day10	0.74	0.69	0.8	0.68	0.97	0.57	0.59	0.56	0.52	0.47
	Day14	1.43	1.06	1.36	1.46	1.39	0.87	0.65	0.86	0.77	0.91
Figure 2g		WT					Gsdmd-/-
	Day14	9	7	6	9	9	11	14	12	11	10
	Day21	4	5	4	4	3	5	10	6	5	6
	Day28	1	5	1	2	2	6	5	5	4	4
Figure 2h		WT					Gsdmd-/-
	Day14	4.78	4.22	3.71	3.61	3.93	4.95	4.35	5.41	5.17	5
	Day21	1.03	1.47	1.04	1.26	1.03	1.87	2.94	1.76	1.49	1.3
	Day28	0.48	0.92	0.4	0.53	0.79	1.23	1.24	1.34	1.21	1.21
