# Supplementary material for: Fracture healing is delayed in the absence of gasdermin-interleukin-1 signaling
Source: eLife. 2022 Mar 4;11:e75753. doi: 10.7554/eLife.75753 (PMC8923664; doi:10.7554/eLife.75753)
Supplement: Figure 3—source data 1. [file elife-75753-fig3-data1.xlsx]

## Sheet: Sheet1
Figure 3a
	WT-unfractured tibias	Gsdmd-/- unfractured tibias	WT-fractured tibias	Gsdmd-/- fractured tibias
	12.39	12.43	12.6	6.62
	17.97	15.27	19.35	6.29
	12.53	9.45	16.99	9.59
	17.64	9.88	15.19	9.8
	14.35	9.67	17.79	5.95
	15.59	11.33	16.88	6.47
Figure 3b
	WT-unfractured tibias	Gsdmd-/- unfractured tibias	WT-fractured tibias	Gsdmd-/- fractured tibias
	0.91	0.91	1.02	0.47
	1.36	1.1	1.45	0.46
	1	0.59	1.37	0.69
	1.4	0.64	1.3	0.66
	1.19	0.6	1.23	0.4
	1.42	0.71	1.08	0.43
Figure 3c
	WT-unfractured tibias	Gsdmd-/- unfractured tibias	WT-fractured tibias	Gsdmd-/- fractured tibias
	168.41	170.31	155.8	92.68
	237.23	212.25	258.57	85.91
	200.57	150.69	210.56	133.82
	222.61	152.68	177.39	146.51
	172.44	155.04	257.74	89.06
	171.19	179.6	264.81	97.87
