# Supplementary material for: Fracture healing is delayed in the absence of gasdermin-interleukin-1 signaling
Source: eLife. 2022 Mar 4;11:e75753. doi: 10.7554/eLife.75753 (PMC8923664; doi:10.7554/eLife.75753)
Supplement: Figure 4—figure supplement 1—source data 1. [file elife-75753-fig4-figsupp1-data1.xlsx]

## Sheet: Sheet1
Figure S6a		WT			Gsdmd-/-
	Control	7.89474	2.81734	7.08978	6.32597	5.88398	10.663
	LPS	1.11455	0.526316	1.95046	3.50829	4.0884	5.08287
	LPS+Nig	73.096	70.3096	68.8235	21.4088	22.9282	22.9834
	LPS+ATP	28.5139	23.9938	18.6997	12.8177	17.6796	17.4586
	LPS+BPs	19.969	22.6006	19.8762	5.71823	8.39779	6.54696
Figure S6a		WT			Gsdmd-/-
	Control	20.21	18.33	17.4	24.66	36.71	40.96
	LPS	26.98	26.25	24.58	33.56	24.11	26.3
	LPS+Nig	5.52	6.87	1.67	0	0.82	8.49
	LPS+ATP	3.13	12.29	15.1	0	0	0
	LPS+BPs	0	0	0	0	0	0
