# Supplementary material for: Fracture healing is delayed in the absence of gasdermin-interleukin-1 signaling
Source: eLife. 2022 Mar 4;11:e75753. doi: 10.7554/eLife.75753 (PMC8923664; doi:10.7554/eLife.75753)
Supplement: Figure 4—source data 1. [file elife-75753-fig4-data1.xlsx]

## Sheet: Sheet1
Figure 4a		BM supernatants from unfractured tibias					BM supernatants from fractured tibias
	WT	13.6214	13.134	13.0055	12.9421	12.921	116.723	66.6454	93.9953	69.6156	46.8753
	Gsdmd-/-	13.5761	13.0055	12.9632	12.9421	12.921	52.4819	52.0732	44.6094	37.5483	30.693
Figure 4b		BM supernatants from unfractured tibias					BM supernatants from fractured tibias
	WT	4.6289	9.6346	35.375	46.8135	28.2254	179.583	139.28	119.314	175.905	118.537
	Gsdmd-/-	16.7853	23.9355	20.3604	31.0853	13.925	91.6321	85.139	79.3956	99.6532	71.9161
