# Supplementary material for: Fracture healing is delayed in the absence of gasdermin-interleukin-1 signaling
Source: eLife. 2022 Mar 4;11:e75753. doi: 10.7554/eLife.75753 (PMC8923664; doi:10.7554/eLife.75753)
Supplement: Figure 4—source data 2. [file elife-75753-fig4-data2.xlsx]

## Sheet: Sheet1
Figure 4c
	Il1b(fold change)		BM-free tibias(unfractured)				BM-free tibias(fractured)
		WT	1	1.28	3.35	1.06	14.12	11.19	9.58	8.69
		Gsdmd-/-	1.84	1.85	1.67	0.69	1.8	2.02	1.02	2.14
	IL18(fold change)		BM-free tibias(unfractured)				BM-free tibias(fractured)
		WT	1	1.08	1.67	0.76	2.6	4.61	2.82	5.96
		Gsdmd-/-	0.86	0.75	0.93	0.88	1.25	1.18	0.92	1.46
	NLRP3(fold change)		BM-free tibias(unfractured)				BM-free tibias(fractured)
		WT	1	0.75	1.03	1.28	2.55	1.44	2.46	1.98
		Gsdmd-/-	0.7	0.64	0.33	0.52	3.04	2.93	3.39	1.73
	Aim2(fold change)		BM-free tibias(unfractured)				BM-free tibias(fractured)
		WT	1	1.01	0.91	1.35	1.83	1.52	1.66	1.77
		Gsdmd-/-	0.58	0.45	0.42	0.6	1.78	1.83	1.75	1.14
Figure 4d
	Il1b(fold change)		BM(unfractured tibias)				BM(fractured tibias)
		WT	1	0.66	0.77	0.76	1.76	2.42	2.19	5.4
		Gsdmd-/-	0.79	0.75	0.74	0.79	0.71	0.41	1.9	1.04
	IL18(fold change)		BM(unfractured tibias)				BM(fractured tibias)
		WT	1	1.11	1.52	1.45	1.59	1.49	2.95	4.22
		Gsdmd-/-	1	0.99	1.2	1.94	0.86	1.67	1.62	1.99
	NLRP3(fold change)		BM(unfractured tibias)				BM(fractured tibias)
		WT	1	0.5	0.7	0.91	0.58	0.55	0.85	0.58
		Gsdmd-/-	0.86	0.79	0.97	0.86	0.6	1.15	1.31	0.53
	Aim2(fold change)		BM(unfractured tibias)				BM(fractured tibias)
		WT	1	0.6	0.65	0.82	0.41	0.81	0.46	0.56
		Gsdmd-/-	0.54	0.55	0.65	0.54	0.55	1.41	0.51	0.37
