# Supplementary material for: Fracture healing is delayed in the absence of gasdermin-interleukin-1 signaling
Source: eLife. 2022 Mar 4;11:e75753. doi: 10.7554/eLife.75753 (PMC8923664; doi:10.7554/eLife.75753)
Supplement: Figure 5—source data 1. [file elife-75753-fig5-data1.xlsx]

## Sheet: Sheet1
Figure 5a		Unfractured tibias					Fractured tibias
	WT	42.5	42.8	33.5	35.3		55.2	59.8	56.3	58.6	57.5
	Gsdmd-/-	38.7	45.5	34.9	40.8		51.5	50.3	48.9	49.5	49
Figure 5b		Unfractured tibias					Fractured tibias
	WT	8.27	6.79	7.37	7.51		17.28	17.82	16.55	13.6	15.37
	Gsdmd-/-	8.09	7.43	8.85	8.87		18.49	20.48	20.06	18.66	19.1
Figure 5c		Unfractured tibias					Fractured tibias
	WT	2.35	2.28	2.97	3.15		2.44	3.1	2.93	3.1	3.05
	Gsdmd-/-	2.85	3.25	3.21	3.61		3.53	2.41	3	2.35	2.35
Figure 5d		Unfractured tibias					Fractured tibias
	WT	2.77448	3.37096	2.24079	4.15085	2.27503	16.5591	44.2752	15.2011	22.1902	11.0119
	Gsdmd-/-	4.84174	3.34384	3.36524	2.2849	5.44079	20.7708	29.9719	17.1671	29.9417	6.77049
Figure 5f		WT			Gsdmd-/-
	Control	0	0	0	0	0	0
	LPS	0	0	0	0	0	0
	LPS+Nig	576.062	486.026	494.992	116.904	177.608	113.929
	LPS+ATP	264.668	227.036	238.123	92.2738	89.7316	85.5542
	LPS+BPs	165.072	195.544	150.902	23.3254	20.068	20.2761
Figure 5h		WT			Gsdmd-/-
	Control	13.6571	15.3525	22.1638	32.453	23.8731	17.0511
	LPS	102.527	116.791	115.004	84.8057	84.8057	86.5723
	LPS+Nig	736.249	704.549	604.757	225.574	307.683	246.904
	LPS+ATP	507.423	531.529	543.639	137.159	96.5207	69.1041
	LPS+BPs	8.59331	15.3525	17.0511	1.92278	5.24181	8.59331
