# Supplementary material for: Fracture healing is delayed in the absence of gasdermin-interleukin-1 signaling
Source: eLife. 2022 Mar 4;11:e75753. doi: 10.7554/eLife.75753 (PMC8923664; doi:10.7554/eLife.75753)
Supplement: Figure 6—source data 1. [file elife-75753-fig6-data1.xlsx]

## Sheet: Sheet1
Figure 6a		WT					Il1r-/-
	Day10	2.69	2.82	2.41	3.04	2.7	1.88	2.22	2.09	2.21	2.49
	Day14	4.02	4.28	3.95	3.58	3.46	3.38	2.76	2.32	3.27	3.22
Figure 6c		WT					Il1r-/-
	Day 7	0.48	0.42	0.47	0.62	0.49	0.32	0.34	0.29	0.25	0.29
	Day 10	0.11	0.06	0.09	0.14	0.14	0.23	0.23	0.2	0.28	0.18
Figure 6d		WT					Il1r-/-
	Day 7	0.27	0.34	0.48	0.39	0.2	0.07	0.21	0.03	0.03	0.09
	Day 10	0.46	0.53	0.52	0.78	0.66	0.14	0.16	0.19	0.34	0.45
Figure 6e		WT					Il1r-/-
	Day10	0.68	0.93	1.06	0.45	0.54	0.53	0.25	0.09	0.22	0.44
	Day14	1.44	1.02	1.29	1.38	1.79	1.01	0.83	0.93	0.66	0.58
Figure 6g		WT					Il1r-/-
	Day14	17	9	20	15	30	26	30	29	24	33
Figure 6h		WT					Il1r-/-
	Day14	4.68	3.5	6.81	6.06	9.35	10.3	10.74	11.75	8.79	12.59
